# Supplementary material for: Behavioral Components and Context of Antimicrobial Prescription in a Tertiary Hospital in Portugal
Source: MDPI journal article supplement (doi:10.3390/antibiotics12061032), 2023-06-08
Supplement: s1 [file s1]

## Supplementary Materials

**Table S1.** Survey Instrument, version in English.

|                                                                                                                                                              |
|--------------------------------------------------------------------------------------------------------------------------------------------------------------|
| 1.Age                                                                                                                                                        |
| 2.Gender                                                                                                                                                     |
| 3.Including internship time, how many years of experience do you have?                                                                                       |
| 4.What is your current Specialty (attending only)?                                                                                                           |
| 5.What is your working hour at CHUSJ?                                                                                                                        |
| 6.How long have you worked at CHUSJ?                                                                                                                         |
| 7.Which department do you belong to?                                                                                                                         |
| 8.My AM prescriptions contribute to AMR in my service                                                                                                        |
| 9.Inadequate use of AM increase chances of Resistance of these drugs                                                                                         |
| 10.The prescription of AM increases the resistance to these drugs                                                                                            |
| 11.I believe there is an inadequate use of AM in my department                                                                                               |
| 12.In my daily activities (mine or from my department) is used to prescribe AM in the follow situations:                                                     |
| Without infection evidence                                                                                                                                   |
| Shorter than ideal                                                                                                                                           |
| Longer than ideal                                                                                                                                            |
| With wider-spectrum antimicrobials than ideal                                                                                                                |
| With narrow-spectrum antimicrobials than ideal                                                                                                               |
| 13. It's my responsibility, as health professional, to help all around me concerned to correct use of AM                                                     |
| 14. It's my responsibility to optimize the antibiotic therapy of my patients                                                                                 |
| 15. I believe on development of new antibiotics in the next 10 years                                                                                         |
| 16. In general, the AM guidelines are not adequate to those whom I prescribe AM                                                                              |
| 17. I know how to find AM guidelines in my dept./hospital                                                                                                    |
| 18. I know how to find AM national guidelines                                                                                                                |
| 19. I prefer to have full autonomy to prescribe AM than to be oriented by another colleague                                                                  |
| 20. I prefer to have just some autonomy and have some orientation from the Program of Control of AMR ("UPCIRA") when prescribing AM than do it by            |
| 21. I am free to decide not to follow the guidelines of AM prescribing of my Dept./Hospital                                                                  |
| 22. I am free to decide not to follow the national/international guidelines of AM prescribing                                                                |
| 23. I am reluctant in change AM prescription from senior colleagues (even if not adequate to the recommendations)                                            |
| 24. I am reluctant in change AM prescription from any colleague (even if not adequate to the recommendations)                                                |
| 25. I used to advice other colleagues about which AM should them to prescribe                                                                                |
| 26. I am not often sure about which AM to prescribe                                                                                                          |
| 27. Prudent prescription of AM is a priority for the clinical team to which I belong                                                                         |
| 28. I feel free and comfortable to question my peers' AM prescriptions                                                                                       |
| 29. I used to ask for advice when prescribing antimicrobials                                                                                                 |
| 30. The knowledge that I have about AM is enough to me to make a good prescription                                                                           |
| 31. Frequently, I am not sure about which AM to prescribe                                                                                                    |
| 32. I prefer to be advised by another doctor about when to stop/change an AM                                                                                 |
| 33. When prescribing AM, I consider the potential that the patient has of developing a health care-associated infection with a multi-resistant microorganism |
| 34. I prescribe an AM even without strong indication when the end of the week is approaching and it is still difficult to predict the course of the disease  |
| According to the pressure about prescribing antimicrobials I feel pressured by:                                                                              |
| 35. Patients                                                                                                                                                 |
| 36.My colleagues                                                                                                                                             |
| 37.My superiors                                                                                                                                              |
| 38.PAPA/UPCIRA                                                                                                                                               |
| 39.From Pharmaceutical companies                                                                                                                             |
| 40. I believe that I should prescribe AM when the patient wants to come back to work                                                                         |
| 41. I believe that I should prescribe AM when there is a delay from the clinical Laboratory to deliver the antibiogram results                               |

|                                                                                                                                                    |
|----------------------------------------------------------------------------------------------------------------------------------------------------|
| 42. Making a decision about AM prescription to patients is somehow easy                                                                            |
| 43. To prescribe or not AM, depend totally on me                                                                                                   |
| 44. I feel confident to make a decision about AM prescribing                                                                                       |
| 45. It's easy to me to decide if I should or shouldn't to prescribe AM                                                                             |
| 46. When treating a patient with suspected infection, without clinical or laboratory confirmation, and without severity                            |
| ...I await and establish antimicrobial therapy only if confirmed                                                                                   |
| ... I start the antimicrobial treatment, adjusting it after the results                                                                            |
| 47. When I receive the results (antibiogram) and I realize the microorganism is sensible to more than one antimicrobial, I'll probably decide for: |
| The AM with less adverse effects to the patient                                                                                                    |
| The AM with less probability to induce adverse community effect (induce resistance)                                                                |
| I start the antimicrobial treatment, adjusting further the results                                                                                 |
| 48. I plan to continue prescribing antimicrobials to patients the way I always have, regardless of having more or less support                     |
| 49. I plan to reduce my antimicrobial prescriptions                                                                                                |
| 50. I plan to stop the prescription of antimicrobials, made by other doctors, who do not have an adequate indication                               |
| 51. I plan to ask to Control of infections Department "PAPA/UPCIRA" advices                                                                        |
